# Supplementary material for: Solute–solvent interactions in lactams–water ternary solvents
Source: Royal Society of Chemistry journal article supplement (doi:10.1039/b417601d), 2005-01-01
Supplement: b417601d.pdf [file b417601d.pdf]

## **Solute-Solvent Interactions in Lactams/Water Ternary Solvents**

**Rafael Alcalde, Santiago Aparicio, Begoña García, María J. Dávila and José M. Leal\***

Universidad de Burgos, Departamento de Química, 09001 Burgos, Spain

Corresponding Author: José M. Leal  
Phone: + 34 947 258 819  
Fax: + 34 947 258 831  
E-mail: [jmleal@ubu.es](mailto:jmleal@ubu.es)

**ELECTRONIC SUPPLEMENTARY INFORMATION**

**Table S1** Literature and this work values of the thermophysical properties of pure solvents at 298.15 K.

| <i>Property</i>                                                    | PYR                  | NMP                  | W                      |
|--------------------------------------------------------------------|----------------------|----------------------|------------------------|
| Density / g cm <sup>-3</sup>                                       | 1.10747 <sup>a</sup> | 1.02788 <sup>a</sup> | 0.99704 <sup>a</sup>   |
|                                                                    | 1.10747 <sup>b</sup> | 1.02832 <sup>b</sup> | 0.9970474 <sup>g</sup> |
|                                                                    | 1.10712 <sup>c</sup> | 1.0262 <sup>c</sup>  | 0.9970480 <sup>h</sup> |
|                                                                    | 1.10722 <sup>d</sup> | 1.0286 <sup>f</sup>  |                        |
| Dynamic Viscosity / mPa s                                          |                      | 1.0259 <sup>g</sup>  |                        |
|                                                                    | 13.39 <sup>a</sup>   | 1.727 <sup>a</sup>   | 0.890 <sup>a</sup>     |
|                                                                    | 13.1 <sup>b</sup>    | 1.66 <sup>b</sup>    | 0.89025 <sup>g</sup>   |
|                                                                    | 13.3 <sup>i</sup>    | 1.667 <sup>f</sup>   | 0.89008 <sup>j</sup>   |
|                                                                    | 1.666 <sup>g</sup>   |                      |                        |
| Speed of Sound / m s <sup>-1</sup>                                 |                      |                      | 1497.0 <sup>a</sup>    |
|                                                                    | 1633.4 <sup>a</sup>  | 1545.0 <sup>a</sup>  | 1497.4 <sup>h</sup>    |
|                                                                    |                      |                      | 1496.7 <sup>j</sup>    |
| Refractive Index                                                   | 1.48649 <sup>a</sup> | 1.46876 <sup>a</sup> | 1.33250 <sup>a</sup>   |
|                                                                    | 1.486 <sup>g</sup>   | 1.4675 <sup>g</sup>  | 1.3325019 <sup>g</sup> |
|                                                                    |                      | 1.4675 <sup>k</sup>  |                        |
| Isentropic Compressibility / TPa <sup>-1</sup>                     | 338.44 <sup>a</sup>  | 407.55 <sup>a</sup>  | 447.54 <sup>a</sup>    |
| Internal Pressure / MPa                                            | 119.21 <sup>a</sup>  | 92.37 <sup>a</sup>   | 394.45 <sup>a</sup>    |
| Isobaric Molar Heat Capacity / J mol <sup>-1</sup> K <sup>-1</sup> | 160.28 <sup>a</sup>  | 174.39 <sup>a</sup>  | 76.07 <sup>a</sup>     |
|                                                                    |                      |                      | 75.328 <sup>j</sup>    |

<sup>a</sup>This work. <sup>b</sup>Ref. 12. <sup>c</sup>Ref. 13. <sup>d</sup>Ref. 14. <sup>e</sup>Ref. 9. <sup>f</sup>Ref. 15. <sup>g</sup>Ref. 16. <sup>h</sup>Ref. 17. <sup>i</sup>Ref. 18. <sup>j</sup>Ref. 19. <sup>k</sup>Ref. 7.

**Table S2** Experimental densities,  $\rho/\text{g cm}^{-3}$ , dynamic viscosities,  $\eta/\text{mPa s}$ , speeds of sound,  $u/\text{m s}^{-1}$ , refractive indices,  $n_D$ , isentropic compressibilities,  $k_S/\text{TPa}^{-1}$ , and internal pressures,  $P_i/\text{MPa}$ , of the  $x$  PYR +  $(1-x)$ W,  $x$  NMP +  $(1-x)$  W and  $x$  PYR +  $(1-x)$  NMP binary mixtures at 298.15 K.

| $x$                   | $\rho$  | $\eta$ | $u$    | $n_D$   | $k_S$  | $P_i$  |
|-----------------------|---------|--------|--------|---------|--------|--------|
| $x$ PYR + $(1-x)$ W   |         |        |        |         |        |        |
| 0.0502                | 1.02139 | 1.470  | 1599.9 |         | 382.49 |        |
| 0.1007                | 1.04146 | 2.240  | 1665.2 | 1.38579 | 346.27 | 327.60 |
| 0.1507                | 1.05692 | 3.170  | 1704.6 |         | 325.62 |        |
| 0.2024                | 1.06916 | 4.250  | 1726.8 | 1.41786 | 313.69 | 277.88 |
| 0.2554                | 1.07855 | 5.430  | 1736.1 |         | 307.63 |        |
| 0.3052                | 1.08520 | 6.530  | 1736.8 | 1.44335 | 305.48 | 241.21 |
| 0.3570                | 1.09039 | 7.600  | 1732.6 |         | 305.50 |        |
| 0.4091                | 1.09429 | 8.580  | 1725.5 | 1.45586 | 306.94 | 210.08 |
| 0.4579                | 1.09712 | 9.390  | 1717.3 |         | 309.08 |        |
| 0.5088                | 1.09935 | 10.110 | 1708.7 | 1.46501 | 311.55 | 186.67 |
| 0.5569                | 1.10109 | 10.690 | 1699.9 |         | 314.30 |        |
| 0.6156                | 1.10270 | 11.280 | 1689.4 | 1.47339 | 317.76 | 166.82 |
| 0.6612                | 1.10369 | 11.650 | 1681.2 |         | 320.55 |        |
| 0.7216                | 1.10475 | 12.080 | 1671.2 | 1.47805 | 324.09 | 150.34 |
| 0.7662                | 1.10536 | 12.340 | 1664.3 |         | 326.61 |        |
| 0.8231                | 1.10604 | 12.620 | 1656.1 | 1.48126 | 329.66 | 137.21 |
| 0.8637                | 1.10645 | 12.820 | 1650.2 |         | 331.91 |        |
| 0.9327                | 1.10703 | 13.130 | 1641.5 | 1.48462 | 335.25 | 125.47 |
| 0.9662                | 1.10730 | 13.284 | 1637.4 |         | 336.85 |        |
| $x$ NMP + $(1-x)$ W   |         |        |        |         |        |        |
| 0.0505                | 1.01275 | 1.861  | 1631.0 |         | 371.17 |        |
| 0.1007                | 1.02639 | 2.898  | 1705.0 | 1.38937 | 335.16 | 307.31 |
| 0.1517                | 1.03650 | 3.978  | 1741.3 |         | 318.18 |        |
| 0.2008                | 1.04160 | 4.791  | 1750.8 | 1.42150 | 313.21 | 250.80 |
| 0.2518                | 1.04584 | 5.189  | 1746.3 |         | 313.55 |        |
| 0.3010                | 1.04726 | 5.215  | 1733.2 | 1.43921 | 317.87 | 209.74 |
| 0.3515                | 1.04725 | 4.998  | 1716.7 |         | 324.03 |        |
| 0.4035                | 1.04632 | 4.736  | 1698.2 | 1.44976 | 331.42 | 178.20 |
| 0.4551                | 1.04496 | 4.256  | 1679.7 |         | 339.19 |        |
| 0.5017                | 1.04351 | 3.892  | 1664.5 | 1.45714 | 345.87 | 155.44 |
| 0.5499                | 1.04172 | 3.497  | 1647.9 |         | 353.52 |        |
| 0.6022                | 1.03954 |        |        | 1.46040 |        | 136.67 |
| 0.6499                | 1.03808 | 2.857  | 1618.1 |         | 367.92 |        |
| 0.7014                | 1.03626 | 2.596  | 1604.4 | 1.46326 | 374.90 | 122.16 |
| 0.7515                | 1.03445 | 2.359  | 1590.9 |         | 381.95 |        |
| 0.8028                | 1.03296 | 2.198  | 1580.5 | 1.46584 | 387.55 | 110.17 |
| 0.8507                | 1.03158 | 2.062  | 1570.8 |         | 392.88 |        |
| 0.9034                | 1.03014 | 1.929  | 1560.8 | 1.46722 | 398.51 | 100.27 |
| 0.9502                | 1.02898 | 1.833  | 1552.9 |         | 403.02 |        |
| $x$ PYR + $(1-x)$ NMP |         |        |        |         |        |        |
| 0.0499                | 1.03159 | 1.857  | 1551.0 |         | 402.98 |        |
| 0.1004                | 1.03534 | 2.017  | 1556.6 | 1.47068 | 398.61 | 94.66  |
| 0.1498                | 1.03903 | 2.185  | 1561.9 |         | 394.52 |        |
| 0.1993                | 1.04274 | 2.371  | 1567.1 | 1.47263 | 390.52 | 97.01  |
| 0.2495                | 1.04652 | 2.583  | 1572.0 |         | 386.65 |        |
| 0.3001                | 1.05037 | 2.821  | 1577.0 | 1.47456 | 382.82 | 99.48  |
| 0.3497                | 1.05416 | 3.080  | 1581.7 |         | 379.20 |        |
| 0.3986                | 1.05796 | 3.373  | 1586.1 | 1.47627 | 375.72 | 101.95 |
| 0.4492                | 1.06190 | 3.715  | 1590.7 |         | 372.16 |        |
| 0.4994                | 1.06583 | 4.101  | 1595.2 | 1.47809 | 368.73 | 104.59 |
| 0.5493                | 1.06979 | 4.539  | 1599.6 |         | 365.31 |        |
| 0.5989                | 1.07376 | 5.030  | 1603.8 | 1.47981 | 362.08 | 107.28 |
| 0.6497                | 1.07787 | 5.615  | 1607.9 |         | 358.86 |        |
| 0.6992                | 1.08193 | 6.269  | 1611.9 | 1.48151 | 355.76 | 110.09 |
| 0.7487                | 1.08602 | 7.022  | 1615.7 |         | 352.72 |        |
| 0.7986                | 1.09019 | 7.918  | 1619.8 | 1.48317 | 349.59 | 112.99 |
| 0.8494                | 1.09446 | 8.969  | 1623.2 |         | 346.76 |        |
| 0.9011                | 1.09883 | 10.232 | 1627.5 | 1.48486 | 343.57 | 116.09 |
| 0.9503                | 1.10307 | 11.651 | 1630.5 |         | 340.99 |        |

**Table S3** Experimental isobaric molar heat capacities,  $C_{P,m} / \text{J mol}^{-1}\text{K}^{-1}$ , of the  $x$  PYR +  $(1-x)$ W,  $x$  NMP +  $(1-x)$  W and  $x$  PYR +  $(1-x)$  NMP binary mixtures at 298.15 K.

| $x$ PYR + $(1-x)$ W |           | $x$ NMP + $(1-x)$ W |           | $x$ PYR + $(1-x)$ NMP |           |
|---------------------|-----------|---------------------|-----------|-----------------------|-----------|
| $x$                 | $C_{P,m}$ | $x$                 | $C_{P,m}$ | $x$                   | $C_{P,m}$ |
| 0.0478              | 83.17     | 0.0307              | 82.13     | 0.0503                | 173.78    |
| 0.0960              | 89.40     | 0.0518              | 86.26     | 0.0707                | 173.57    |
| 0.1480              | 95.58     | 0.0847              | 91.87     | 0.1006                | 173.22    |
| 0.2467              | 105.10    | 0.1537              | 101.89    | 0.1487                | 172.60    |
| 0.3455              | 113.86    | 0.2039              | 107.97    | 0.1997                | 171.95    |
| 0.4485              | 122.04    | 0.2602              | 114.26    | 0.3003                | 170.57    |
| 0.5457              | 129.05    | 0.3094              | 118.92    | 0.3515                | 169.87    |
| 0.6446              | 135.94    | 0.3622              | 123.77    | 0.5009                | 167.77    |
| 0.7471              | 142.99    | 0.4648              | 131.99    | 0.6042                | 166.31    |
| 0.8524              | 150.40    | 0.5541              | 139.52    | 0.7556                | 164.10    |
| 0.9485              | 157.10    | 0.6265              | 144.99    | 0.8338                | 162.94    |
|                     |           | 0.7451              | 154.11    | 0.8989                | 161.91    |
|                     |           | 0.8582              | 162.88    |                       |           |

**Table S4** Experimental densities,  $\rho/\text{g cm}^{-3}$ , dynamic viscosities,  $\eta/\text{mPa s}$ , speeds of sound,  $u/\text{m s}^{-1}$ , refractive indices,  $n_D$ , isentropic compressibilities,  $k_S/\text{TPa}^{-1}$ , and internal pressures,  $P_i/\text{MPa}$ , of the  $x_1$  PYR +  $x_2$  NMP +  $(1 - x_1 - x_2)$  W ternary mixtures at 298.15 K.

| $x_1$  | $x_2$  | $\rho$  | $\eta$ | $u$    | $n_D$   | $k_S$  | $P_i$  |
|--------|--------|---------|--------|--------|---------|--------|--------|
| 0.0905 | 0.8107 | 1.03744 | 2.265  | 1573.9 | 1.46897 | 389.12 | 102.89 |
| 0.0805 | 0.7228 | 1.03976 | 2.546  | 1590.8 | 1.46722 | 380.05 | 112.61 |
| 0.0698 | 0.6317 | 1.04258 | 2.980  | 1613.1 | 1.46470 | 368.60 | 124.82 |
| 0.0600 | 0.5422 | 1.04571 | 3.560  | 1640.9 | 1.46165 | 355.15 | 139.54 |
| 0.0500 | 0.4537 | 1.04856 | 4.283  | 1669.2 | 1.45689 | 342.30 | 157.58 |
| 0.0398 | 0.3615 | 1.05085 | 5.077  | 1703.5 | 1.44995 | 327.94 | 181.71 |
| 0.0300 | 0.2708 | 1.05076 | 5.479  | 1736.0 | 1.35493 | 315.81 | 185.28 |
| 0.0201 | 0.1806 | 1.04515 | 4.786  | 1750.0 | 1.34845 | 312.43 | 225.09 |
| 0.1797 | 0.7207 | 1.04466 | 2.658  | 1584.5 | 1.47075 | 381.30 | 105.44 |
| 0.1598 | 0.6417 | 1.04660 | 2.986  | 1600.1 | 1.46870 | 373.21 | 115.40 |
| 0.1402 | 0.5653 | 1.04887 | 3.425  | 1620.6 | 1.46611 | 363.03 | 126.98 |
| 0.1212 | 0.4825 | 1.05160 | 4.047  | 1646.4 | 1.46258 | 350.82 | 142.11 |
| 0.0983 | 0.4017 | 1.05382 | 4.763  | 1676.3 | 1.45736 | 337.69 | 161.21 |
| 0.0803 | 0.3217 | 1.05544 | 5.477  | 1708.6 | 1.44967 | 324.56 | 184.31 |
| 0.0609 | 0.2414 | 1.05443 | 5.651  | 1738.7 | 1.43795 | 313.73 | 214.64 |
| 0.0198 | 0.0806 | 1.02923 | 2.822  | 1698.8 | 1.38650 | 336.69 | 310.39 |
| 0.2694 | 0.6316 | 1.05140 | 4.746  | 1589.0 | 1.42202 | 376.68 | 99.54  |
| 0.2411 | 0.5638 | 1.05349 | 5.850  | 1608.2 |         | 367.01 |        |
| 0.2105 | 0.4930 | 1.05548 | 5.845  | 1629.2 | 1.45079 | 356.96 | 126.69 |
| 0.1831 | 0.4302 | 1.05729 | 5.285  | 1650.9 | 1.45829 | 347.05 | 142.10 |
| 0.1492 | 0.3517 | 1.05924 | 4.516  | 1681.8 | 1.46411 | 333.76 | 165.64 |
| 0.1195 | 0.2818 | 1.05990 | 3.969  | 1711.8 | 1.46743 | 321.98 | 192.75 |
| 0.0901 | 0.2113 | 1.05778 | 3.472  | 1739.7 | 1.47036 | 312.35 | 229.38 |
| 0.0592 | 0.1410 | 1.04962 | 3.027  | 1746.9 | 1.47286 | 312.21 | 281.68 |
| 0.3591 | 0.5424 | 1.06017 | 3.689  | 1607.4 | 1.47425 | 365.05 | 110.65 |
| 0.3208 | 0.4826 | 1.06055 | 4.095  | 1616.8 | 1.47170 | 360.71 | 120.64 |
| 0.2820 | 0.4217 | 1.06220 | 4.615  | 1636.7 | 1.46871 | 351.44 | 133.01 |
| 0.2409 | 0.3634 | 1.06357 | 5.259  | 1659.6 | 1.46464 | 341.35 | 147.87 |
| 0.2008 | 0.3018 | 1.06478 | 5.878  | 1688.3 | 1.45862 | 329.50 | 166.81 |
| 0.1601 | 0.2411 | 1.06460 | 6.255  | 1715.2 | 1.45099 | 319.29 | 190.88 |
| 0.1200 | 0.1812 | 1.06156 | 6.019  | 1740.1 | 1.43870 | 311.12 | 221.17 |
| 0.0397 | 0.0601 | 1.03192 | 2.706  | 1690.6 | 1.34299 | 339.06 | 293.07 |
| 0.4504 | 0.4504 | 1.06675 | 4.459  | 1609.4 | 1.47573 | 361.91 | 113.34 |
| 0.4000 | 0.4030 | 1.06771 |        |        |         |        |        |
| 0.3511 | 0.3518 | 1.06886 | 5.376  | 1644.2 | 1.47249 | 346.08 | 136.63 |
| 0.3023 | 0.3041 | 1.06979 | 5.917  | 1666.7 | 1.46562 | 336.51 | 150.63 |
| 0.2501 | 0.2509 | 1.07023 | 6.543  | 1692.4 | 1.45948 | 326.25 | 170.37 |
| 0.2005 | 0.2003 | 1.06919 | 6.664  | 1720.0 | 1.45064 | 316.17 | 193.99 |
| 0.1504 | 0.1509 | 1.06528 | 6.176  | 1740.7 | 1.43870 | 309.81 | 224.27 |
| 0.1005 | 0.0998 | 1.05443 | 4.660  | 1742.1 | 1.41878 | 312.50 | 264.05 |
| 0.5434 | 0.3637 | 1.07431 | 5.385  | 1616.3 | 1.47697 | 356.33 | 115.46 |
| 0.4853 | 0.3246 | 1.07577 | 5.784  | 1653.2 | 1.47464 | 340.12 | 125.77 |
| 0.4236 | 0.2830 | 1.07614 | 6.325  | 1670.2 | 1.47032 | 333.11 | 138.50 |
| 0.3680 | 0.2452 | 1.07585 | 6.711  | 1696.0 | 1.46701 | 323.15 | 152.71 |
| 0.3016 | 0.2016 | 1.07500 | 7.096  | 1721.9 | 1.46059 | 313.73 | 173.15 |
| 0.2398 | 0.1607 | 1.06916 | 7.046  | 1741.3 | 1.45172 | 308.47 | 196.69 |
| 0.0589 | 0.0399 | 1.03370 | 2.549  | 1680.2 | 1.38620 | 342.68 | 319.98 |
| 0.6350 | 0.2737 | 1.08214 | 5.385  | 1623.9 | 1.47883 | 350.43 | 118.27 |
| 0.5710 | 0.2467 | 1.08236 | 5.784  | 1637.3 | 1.47314 | 344.63 | 127.19 |
| 0.4899 | 0.2109 | 1.08265 | 6.325  | 1660.2 | 1.47015 | 335.10 | 142.17 |
| 0.4321 | 0.1860 | 1.08252 | 6.711  | 1674.5 | 1.46803 | 329.46 | 155.13 |
| 0.3523 | 0.1515 | 1.08152 | 7.096  | 1699.9 | 1.46112 | 319.99 | 176.49 |
| 0.2803 | 0.1196 | 1.07888 | 7.046  | 1723.6 | 1.45189 | 312.02 | 201.15 |

**Table S4** Continued.

| $x_1$  | $x_2$  | $\rho$  | $\eta$ | $u$    | $n_D$   | $k_S$  | $P_i$  |
|--------|--------|---------|--------|--------|---------|--------|--------|
| 0.2119 | 0.0912 | 1.07266 | 6.281  | 1740.9 | 1.43871 | 307.61 | 229.90 |
| 0.1397 | 0.0601 | 1.06026 | 2.549  | 1736.9 | 1.41891 | 312.65 | 270.43 |
| 0.7255 | 0.1819 | 1.09017 | 8.133  | 1632.5 | 1.48063 | 344.19 | 121.50 |
| 0.6528 | 0.1637 | 1.09014 | 8.361  | 1643.6 | 1.47771 | 339.58 | 131.17 |
| 0.5732 | 0.1446 | 1.08981 | 8.582  | 1659.9 | 1.47382 | 333.04 | 143.50 |
| 0.5001 | 0.1252 | 1.08930 | 8.745  | 1679.0 | 1.46934 | 325.67 | 157.37 |
| 0.4259 | 0.1049 | 1.08811 | 8.649  | 1697.6 | 1.46354 | 318.91 | 174.50 |
| 0.3225 | 0.0804 | 1.08391 | 7.858  | 1724.5 | 1.45251 | 310.23 | 203.84 |
| 0.2404 | 0.0603 | 1.07620 | 6.387  | 1740.5 | 1.43792 | 306.73 | 233.89 |
| 0.8215 | 0.0852 | 1.09893 | 10.395 | 1639.6 | 1.48208 | 338.51 | 124.92 |
| 0.7449 | 0.0745 | 1.09872 | 10.449 | 1650.7 | 1.47919 | 334.01 | 134.41 |
| 0.6561 | 0.0654 | 1.09799 | 10.383 | 1665.8 | 1.47520 | 328.22 | 146.75 |
| 0.5435 | 0.0562 | 1.09604 | 9.969  | 1687.8 | 1.46849 | 320.27 | 165.33 |
| 0.4499 | 0.0507 | 1.09313 | 9.287  | 1706.7 | 1.46164 | 314.07 | 184.09 |
| 0.3618 | 0.0358 | 1.08908 | 8.181  | 1726.5 | 1.45169 | 308.05 | 208.99 |
| 0.2720 | 0.0270 | 1.08076 | 6.440  | 1739.0 | 1.43770 | 305.97 | 238.36 |
| 0.1797 | 0.0186 | 1.06573 | 4.351  | 1729.8 | 1.41802 | 313.59 | 277.26 |
| 0.0900 | 0.0094 | 1.03953 | 2.344  | 1668.8 | 1.38497 | 345.42 | 326.15 |

**Table S5** Experimental isobaric molar heat capacities,  $C_{P,m} / \text{J mol}^{-1}\text{K}^{-1}$ , of the  $x_1$  PYR +  $x_2$  NMP +  $(1 - x_1 - x_2)$  W ternary mixtures at 298.15 K.

| $x_1$  | $x_2$  | $C_{P,m}$ | $x_1$  | $x_2$  | $C_{P,m}$ | $x_1$  | $x_2$  | $C_{P,m}$ |
|--------|--------|-----------|--------|--------|-----------|--------|--------|-----------|
| 0.0905 | 0.8086 | 166.93    | 0.3334 | 0.4584 | 154.57    | 0.5007 | 0.1938 | 143.79    |
| 0.0801 | 0.7212 | 159.30    | 0.2806 | 0.4191 | 148.15    | 0.4200 | 0.1812 | 137.52    |
| 0.0715 | 0.6284 | 151.25    | 0.2412 | 0.3551 | 140.87    | 0.3543 | 0.1515 | 130.53    |
| 0.0608 | 0.5419 | 144.30    | 0.2009 | 0.2993 | 133.59    | 0.2797 | 0.1206 | 122.61    |
| 0.0503 | 0.4529 | 136.66    | 0.1615 | 0.2431 | 126.19    | 0.2090 | 0.0914 | 114.32    |
| 0.0410 | 0.3461 | 127.30    | 0.1162 | 0.1815 | 117.01    | 0.1402 | 0.0600 | 104.69    |
| 0.0296 | 0.2719 | 119.24    | 0.0396 | 0.0595 | 94.21     | 0.7173 | 0.1840 | 157.13    |
| 0.0197 | 0.1852 | 109.48    | 0.4465 | 0.4527 | 161.90    | 0.6408 | 0.1615 | 150.30    |
| 0.1752 | 0.7252 | 165.26    | 0.3998 | 0.4003 | 154.53    | 0.5575 | 0.1442 | 144.72    |
| 0.1605 | 0.6404 | 157.61    | 0.3504 | 0.3530 | 147.83    | 0.4832 | 0.1195 | 137.81    |
| 0.1401 | 0.5652 | 150.50    | 0.3016 | 0.3024 | 140.62    | 0.3978 | 0.1009 | 130.32    |
| 0.1183 | 0.4847 | 143.15    | 0.2498 | 0.2520 | 133.11    | 0.3234 | 0.0809 | 122.36    |
| 0.1026 | 0.3879 | 134.58    | 0.2014 | 0.2012 | 125.28    | 0.2412 | 0.0608 | 113.09    |
| 0.0798 | 0.3237 | 128.72    | 0.1498 | 0.1515 | 116.20    | 0.8093 | 0.0918 | 157.31    |
| 0.0613 | 0.2423 | 119.35    | 0.0994 | 0.0990 | 105.27    | 0.7212 | 0.0801 | 149.81    |
| 0.0199 | 0.0811 | 95.97     | 0.5409 | 0.3610 | 160.48    | 0.6322 | 0.0679 | 142.70    |
| 0.2697 | 0.6318 | 165.93    | 0.4824 | 0.3204 | 153.14    | 0.5415 | 0.0606 | 135.28    |
| 0.2424 | 0.5613 | 158.37    | 0.4212 | 0.2788 | 145.78    | 0.4496 | 0.0510 | 127.99    |
| 0.2117 | 0.4886 | 150.58    | 0.3596 | 0.2430 | 139.03    | 0.3535 | 0.0406 | 120.16    |
| 0.1803 | 0.4207 | 142.40    | 0.3152 | 0.1881 | 131.43    | 0.2695 | 0.0300 | 112.34    |
| 0.1584 | 0.3660 | 136.57    | 0.2410 | 0.1586 | 123.58    | 0.1789 | 0.0202 | 103.51    |
| 0.1216 | 0.2795 | 126.88    | 0.1794 | 0.1208 | 115.20    | 0.0882 | 0.0101 | 91.47     |
| 0.0908 | 0.2106 | 118.30    | 0.0601 | 0.0401 | 93.53     |        |        |           |
| 0.0608 | 0.1323 | 106.89    | 0.6302 | 0.2690 | 158.29    |        |        |           |
| 0.3640 | 0.5381 | 162.82    | 0.5641 | 0.2387 | 151.57    |        |        |           |

**Table S6** Coordinates for the maxima and minima of the ternary contributions to the different excess and mixing properties defined according to eqn. (2) for the  $x_1$  PYR +  $x_2$  NMP +  $(1 - x_1 - x_2)$  W Ternary System at 298.15 K.

| <i>Property</i>                                                      | <i>Maximum</i>                   |               | <i>Minimum</i>                   |               |
|----------------------------------------------------------------------|----------------------------------|---------------|----------------------------------|---------------|
|                                                                      | <i>Position</i>                  | <i>Amount</i> | <i>Position</i>                  | <i>Amount</i> |
| $(V_{m,TER}^E - V_{m,BIN}^E)/\text{cm}^3\text{mol}^{-1}$             | $x_1 = 0.2909$<br>$x_2 = 0.3076$ | 0.0964        | —                                | —             |
| $(\Delta_{mix}\eta_{TER} - \Delta_{mix}\eta_{BIN})/\text{mPa s}$     | $x_1 = 0.0729$<br>$x_2 = 0.4859$ | 0.118         | $x_1 = 0.5465$<br>$x_2 = 0.2256$ | -0.960        |
| $(\Delta G_{m,TER}^{*E} - \Delta G_{m,BIN}^{*E})/\text{kJ mol}^{-1}$ | $x_1 = 0.1680$<br>$x_2 = 0.7189$ | 0.134         | $x_1 = 0.3117$<br>$x_2 = 0.1977$ | -0.729        |
| $(k_{S,TER}^E - k_{S,BIN}^E)/\text{TPa}^{-1}$                        | $x_1 = 0.2234$<br>$x_2 = 0.6493$ | 3.40          | $x_1 = 0.2679$<br>$x_2 = 0.1857$ | -8.89         |
| $(P_{i,TER}^E - P_{i,BIN}^E)/\text{MPa}$                             | $x_1 = 0.2731$<br>$x_2 = 0.2587$ | 10.35         | —                                | —             |
| $(C_{P,m,TER}^E - C_{P,m,BIN}^E)/\text{Jmol}^{-1}\text{K}^{-1}$      | $x_1 = 0.3226$<br>$x_2 = 0.4014$ | 1.47          | —                                | —             |



**Table S7** Coordinates for the maxima and minima of the partial molar excess properties, and values at infinite dilution for the binary constituents at 298.15 K.

| Compound | Minimum                                   |        | Maximum  |        | Value at infinite dilution |        | Minimum  |        | Maximum  |        | Value at infinite dilution |
|----------|-------------------------------------------|--------|----------|--------|----------------------------|--------|----------|--------|----------|--------|----------------------------|
|          | Position                                  | Amount | Position | Amount | Position                   | Amount | Position | Amount | Position | Amount |                            |
|          | $x \text{ PYR} + (1 - x) \text{ W}$       |        |          |        |                            |        |          |        |          |        |                            |
|          | $\bar{V}^E / \text{cm}^3 \text{mol}^{-1}$ |        |          |        |                            |        |          |        |          |        |                            |
| PYR      | 0.0963                                    | -2.23  | 0.9301   | 0.00   | -1.44                      | 0.6604 | 0.00     | 0.8473 | 0.62     | 78.37  |                            |
| W        | 0.9301                                    | -1.38  | 0.0963   | 0.03   | -1.38                      | 0.8463 | 13.76    | 0.6604 | 15.71    | 27.41  |                            |
|          | $x \text{ NMP} + (1 - x) \text{ W}$       |        |          |        |                            |        |          |        |          |        |                            |
|          | $\bar{V}^E / \text{cm}^3 \text{mol}^{-1}$ |        |          |        |                            |        |          |        |          |        |                            |
| NMP      | 0.0882                                    | -4.83  | 0.9018   | 0.01   | -3.40                      | 0.5546 | -1.07    | 0.8327 | 0.37     | 108.56 |                            |
| W        | 0.9018                                    | -2.67  | 0.0882   | 0.04   | -2.21                      | 0.8327 | 17.39    | 0.5546 | 20.65    | 24.16  |                            |
|          | $x \text{ PYR} + (1 - x) \text{ NMP}$     |        |          |        |                            |        |          |        |          |        |                            |
|          | $\bar{V}^E / \text{cm}^3 \text{mol}^{-1}$ |        |          |        |                            |        |          |        |          |        |                            |
| PYR      | ---                                       | ---    | ---      | ---    | -1.04                      | ---    | ---      | ---    | ---      | 3.04   |                            |
| NMP      | ---                                       | ---    | ---      | ---    | -0.78                      | ---    | ---      | ---    | ---      | 2.74   |                            |
